## RESEARCH ARTICLE

# Land productivity dynamics in and around protected areas globally from 1999 to 2013

Begoña de la Fuente<sup>1</sup>, Mélanie Weynants<sup>1,2</sup>, Bastian Bertzky<sup>2</sup>, Giacomo Delli<sup>2</sup>, Andrea Mandrici<sup>2</sup>, Eduardo Garcia Bendito<sup>2</sup>, Grégoire Dubois<sup>1,2\*</sup>

**1** ETSI Montes, Forestal y del Medio Natural, Universidad Politécnica de Madrid, Madrid, Spain, **2** Joint Research Centre of the European Commission, Ispra, Italy

\* [gregoire.dubois@ec.europa.eu](mailto:gregoire.dubois@ec.europa.eu)

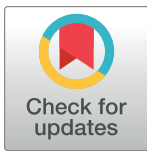

## Abstract

Tracking changes in total biomass production or land productivity is an essential part of monitoring land transformations and long-term alterations of the health and productive capacity of land that are typically associated with land degradation. Persistent declines in land productivity impact many terrestrial ecosystem services that form the basis for sustainable livelihoods of human communities. Protected areas (PAs) are key to globally conserve biodiversity and ecosystem services that are critical for human well-being, and cover about 15% of the land worldwide. Here we globally assess the trends in land productivity in PAs of at least 10 km<sup>2</sup> and in their unprotected surroundings (10 km buffers) from 1999 to 2013. We quantify the percentage of the protected and unprotected land that shows stable, increasing or decreasing trends in land productivity, quantified as long-term (15 year) changes in above-ground biomass derived from satellite-based observations with a spatial resolution of 1 km. We find that 44% of the land in PAs globally has retained the productivity at stable levels from 1999 to 2013, compared to 42% of stable productivity in the unprotected land around PAs. Persistent increases in productivity are more common in the unprotected lands around PAs (32%) than within PAs (18%) globally, while about 14% of the protected land and 12% of the unprotected land around PAs has experienced declines in land productivity. Oceania has the highest percentage of land with stable productivity in PAs (57%), whereas Europe has the lowest percentage (38%) and also the largest share of protected land with increasing land productivity (32%). We discuss the observed differences between PAs and unprotected lands, and between different parts of the world, in relation to different types and levels of human activities and their impact on land productivity. Our assessment of land productivity dynamics helps to characterise the state, pressures and changes in and around protected areas globally. Further research may focus on more detailed analyses to disentangle the relative contribution of specific drivers (from climate change to land use change) and their interaction with land productivity dynamics and potential land degradation in different regions of the world.

## OPEN ACCESS

**Citation:** de la Fuente B, Weynants M, Bertzky B, Delli G, Mandrici A, Garcia Bendito E, et al. (2020) Land productivity dynamics in and around protected areas globally from 1999 to 2013. *PLoS ONE* 15(8): e0224958. <https://doi.org/10.1371/journal.pone.0224958>

**Editor:** Jose M. Martínez-Paz, Universidad de Murcia, SPAIN

**Received:** October 24, 2019

**Accepted:** July 9, 2020

**Published:** August 5, 2020

**Copyright:** © 2020 de la Fuente et al. This is an open access article distributed under the terms of the [Creative Commons Attribution License](https://creativecommons.org/licenses/by/4.0/), which permits unrestricted use, distribution, and reproduction in any medium, provided the original author and source are credited.

**Data Availability Statement:** Main result are available from <https://data.jrc.ec.europa.eu/dataset/b207a3ae-8b18-453b-8234-8cfd1d4c805>.

**Funding:** This study, the development and maintenance of the Digital Observatory for Protected Areas and the production of the land productivity map were supported mainly by the institutional activities of the Directorate D (Sustainable Resources) at the Joint Research Centre of the European Commission. We also acknowledge the contribution of the Biodiversity

and Protected Areas Management (BIOPAMA) EU-ACP programme, an initiative of the African, Caribbean and Pacific (ACP) Group of States financed by the 10th and 11th European Development Funds of the European Union (EU). The funders had no role in study design, data collection and analysis, decision to publish, or preparation of the manuscript.

**Competing interests:** The authors have declared that no competing interests exist.

## 1. Introduction

The increasing demand of biomass for food, fodder, fibre, and energy is driving changes in ecosystems globally [1–4]. The state of vegetation cover is one reliable and accepted measure associated with land productivity, since it is related to the set of ecological conditions and to the impacts of natural and anthropogenic environmental change [4]. Therefore, information on trends in total biomass production or land productivity are required to characterize changes that are typically associated with land degradation [5, 6]. Persistent changes in land productivity, as captured through plant biomass production, point to long-term alteration of the health and productive capacity of land [4]. Almost all terrestrial ecosystem services that sustain human livelihoods will be directly or indirectly impacted by a persistent reduction in land productivity. Trends in land productivity have been adopted as one of three land-based progress indicators of the United Nations Convention to Combat Desertification [7], which are used for mandatory reporting. Land productivity trends have also been proposed as one sub-indicator for monitoring and assessing progress towards achieving the UN Sustainable Development Goal (SDG) 15, target 3 [8]. Declining productivity, however, is certainly not the only indicator of possible land degradation, which is a complex and multi-faceted phenomenon. Increased productivity can sometimes happen at the cost of other land resources, such as water or soil; in this case, it can lead to degradation that would be observable only in later stages [4].

Protected areas (PAs) are the result of a key strategy in global efforts to conserve biodiversity and ecosystem services that are critical for human well-being [9, 10]. PAs are established and managed to achieve the long-term conservation of nature with associated ecosystem services and cultural values [11]. They play a fundamental role in the *in situ* conservation of genetic, species and ecosystem diversity, and the delivery of economic, social and cultural benefits from nature to people [10, 12, 13]. The critical importance of PAs is recognized in several international agreements and targets for biodiversity conservation and sustainable development. In Aichi Target 11 of the Strategic Plan for Biodiversity 2011–2020 of the Convention on Biological Diversity (CBD), the 196 CBD Parties agreed to conserve by 2020 at least 17% of terrestrial and inland water areas through effectively and equitably managed, ecologically representative and well-connected systems of PAs [14]. Terrestrial PAs also contribute to the conservation target 15.1 of SDG 15 as they seek to “protect, restore and promote sustainable use of terrestrial ecosystems” [15].

As of July 2018, PAs cover almost 15% of the Earth’s land area, compared to around 10% in 1992 when the CBD was signed [10]. Thus, terrestrial PAs are globally important and are expanding in extent. Depending on their primary management objectives, PAs are commonly classified into different management categories, ranging from strict nature reserves to sustainable use areas [11].

Here, we assess the trends in land productivity in PAs and in their unprotected surroundings (10 km buffers) globally from 1999 to 2013. We quantify the percentage of the global protected and unprotected land that shows stable, increasing or decreasing trends in land productivity, and examine the difference in land productivity dynamics across continents and for different PA management categories. By doing so, we provide a relevant indicator that helps to characterise the state, pressures and changes in and around protected areas globally. We note that to identify critical land degradation zones, land productivity dynamics (hereafter LPD) must be further analysed within the context of anthropogenic land use and other environmental changes. Land productivity as here analysed and presented refers to observed changes of above-ground biomass and is conceptually different from, and not necessarily related to, agricultural production or income per unit area.

The final aim of the paper is to quantify the LPD trends within and around protected areas as a first step for further insights on whether they have been successful or not on protecting the land against processes that lead to unstable land productivity.

## 2. Materials and methods

### 2.1. Protected areas and 10 km buffer zones

We retrieved the spatial extent of PAs at the global scale using the public version of the World Database on Protected Areas (WDPA) for May 2019 from Protected Planet [16]. The WDPA is managed by the World Conservation Monitoring Centre (WCMC) of the United Nations Environment Programme (UNEP) in collaboration with the International Union for Conservation of Nature (IUCN), and is collated from national and regional datasets [17]. This dataset consists of 242,784 protected areas (PAs), of which those of 10 km<sup>2</sup> or larger (42,529 PAs) are documented in detail in the Digital Observatory for Protected Areas (DOPA) developed by the Joint Research Centre of the European Commission [18, 19]. The DOPA, accessible at <http://dopa.jrc.ec.europa.eu>, provides a broad range of consistent and comparable indicators on PAs at country, ecoregion and protected area level [18]. These indicators are particularly relevant for Aichi Biodiversity Target 11 (Protected Areas) of the CBD, for which DOPA provides several official indicators (PA connectivity as a measure of how well connected terrestrial PA systems are, and PA coverage of terrestrial and marine ecoregions as a measure of PA representativeness), and the UN Sustainable Development Goals 14 (Life below Water) and 15 (Life on Land).

In this study, we excluded from the original dataset the following PAs. First, we excluded 12,871 PAs with undefined boundaries, so-called point PAs that are reported by national authorities with only a single geographic reference for the centre of the PA. Second, we excluded 1564 polygon PAs with status 'Not reported' or 'Proposed', in line with common practice for global PA analyses (e.g., [20, 21]). Third, we excluded the UNESCO-MAB and the Biosphere Reserves, as their buffer areas and transition zones may not meet the IUCN protected area definition [11], and because most of their core areas overlap with other protected areas [20]. Fourth, we excluded 4,222 marine PAs, i.e. we only considered PAs classified in the WDPA as terrestrial and coastal (the latter comprised both terrestrial and marine portions. Since the land productivity dynamics has null values for water areas, marine portions are not considered in our analyses). Fifth, we excluded all PAs that had not been already designated before 1999 (as well as those that had no designation year reported in the WDPA), given that the temporal period here considered is from 1999 to 2013 (see next section). Last, we retained only PAs larger than 10 km<sup>2</sup>. This led to a subset of 40,234 PAs, object of this study, covering a total of 18,867,255 km<sup>2</sup> and representing 99.96% of the 18,874,086 km<sup>2</sup> of protected land area at global level.

In addition, in order to compare changes within and around the PAs, we considered, around each PA, a 10 km buffer zone that did not overlap with other PAs, hereafter referred to as the unprotected 10-km buffer (BU in figures).

All analyses were performed by rasterizing the PAs and their unprotected buffers to a spatial resolution of 1 km x 1 km, which is the resolution of the layer on land productivity dynamics, as described next.

### 2.2. Land productivity dynamics

The dataset used for the analysis of land productivity dynamics (LPD) in and around PAs was developed in the context of the World Atlas of Desertification [4] and previously presented in the Global Land Outlook [22]. It is available at <https://wad.jrc.ec.europa.eu/landproductivity>.

This global map is a non-parametric combination of datasets derived from vegetation phenological metrics that relate to the land's capacity to sustain primary production [23–26]. It is based on time series of indices of vegetation photosynthetic activity, namely the Normalized Difference Vegetation Index (NDVI), obtained from satellite data acquired by the SPOT VEGETATION sensor. Research has shown that time series of remotely sensed vegetation indices, such as those used for deriving LPD, are correlated with biophysically meaningful vegetation characteristics such as photosynthetic capacity and primary production. These characteristics are closely related to global land surface changes and biomass trajectories that can be associated with processes of land degradation and recovery [5, 27].

The LPD map contains information on persistent trajectories of land productivity dynamics in vegetated areas over 15 years, from 1999 to 2013, with a spatial resolution of 1 km, grouped in the following classes:

1. Persistent severe decline in productivity
2. Persistent moderate decline in productivity
3. Stable, but stressed; persistent strong inter-annual productivity variations
4. Stable productivity
5. Persistent increase in productivity

For each PA and its unprotected buffer we calculated the percentage of the land area covered by each of these five qualitative LPD classes. Areas with no photosynthetically active vegetation (i.e., hyper-arid, arctic and very-high altitude mountain regions), for which no information on land productivity trends is available but that were part of the area of the PAs or their buffers, were considered separately as null data. Therefore, the sum of the percentage of the area covered by each of the five productivity classes could be less than 100% because of the presence of unvegetated areas. In addition, we calculated the percentage of all land (either protected or unprotected) covered by the five LPD classes globally and in each country, as a reference for comparison of the relative prevalence of each of the classes obtained in the PAs and their buffers. To summarize the LPD results, we combined the first three classes into a single class referred to as declining land productivity for brevity. In some of the analyses we combined the declining land productivity (first three classes) and the increasing productivity class (the last one) in a single category of unstable productivity to compare it with the percentage of land with stable land productivity.

We aggregated the LPD results, both within and around PAs, by continents using the M49 standard of the Statistics Division of the United Nations Secretariat, available at <https://unstats.un.org/unsd/methodology/m49/> (accessed May 2019). Country boundaries were provided by the Global Administrative Unit Layers for year 2015, developed by the Food and Agricultural Organization (FAO) of the United Nations [28]. We used the M49 classification field “region name” (here referred to as continents) to classify the world into 6 continents. Continental values are, therefore, influenced by the M49 country groupings, such as the Russian Federation being included in Europe (continent) and Eastern Europe (region), or Greenland being included within the Americas (continent) and Northern America (region), among other examples. We also calculated the aggregated LPD values for the European Union (EU), considering the 28 countries within the EU when this analysis was conducted (EU-28). Each PA, as well as its unprotected buffer, was considered to belong to the country reported in the ISO3 field of the WDPA. Note that the ISO3 codes from the WDPA include cases of territories under the sovereignty of other nations. Examples are Reunion Island, a French overseas territory located in the [Indian Ocean](#), and [Greenland](#), a self-governing territory that is part of the

Kingdom of Denmark. In calculating EU values, we excluded the PAs in territories whose reported ISO3 in the WDPA was different from those 28 countries, even if under the sovereignty of a EU member state, as in the case of Greenland or Réunion Island.

We also considered, for each PA, the information available in the WDPA regarding the management category (as defined in Dudley [11]) and summarized the LPD area values separately for each category. IUCN protected area management categories classify protected areas according to their management objectives as Ia (strict nature reserve), Ib (wilderness area), II (national park), III (natural monument or feature), IV (habitat/species management area), V (protected landscape) and VI (protected area with sustainable use of natural resources) [11].

### 3. Results

#### 3.1. Global land productivity dynamics

Globally, the extent of land with stable productivity from 1999 to 2013 (42%) is larger than that of decreasing and increasing productivity combined (34%) (Figs 1 and 2). There is more land with increasing (19%) than with decreasing productivity (15%) (Figs 1 and 2). As stressed in Cherlet et al. [4], proportionally, major declines or stressed productivity dynamics are found in Australia and Oceania (37%), South America (27%) and Africa (22%). These are much higher values than for Europe (12%), Asia (14%) and Northern America (18%). The authors also stressed that 20% of the world's croplands show declining or stressed land productivity, a worrying finding considering the intense competition for land.

Looking at PAs, we find that nearly half of the land under protection has a stable land productivity (49%), as shown in Fig 2. Global dynamics in land productivity within terrestrial and coastal PAs larger than 10 km<sup>2</sup> are mainly stable (44% of the protected land), as shown in Figs

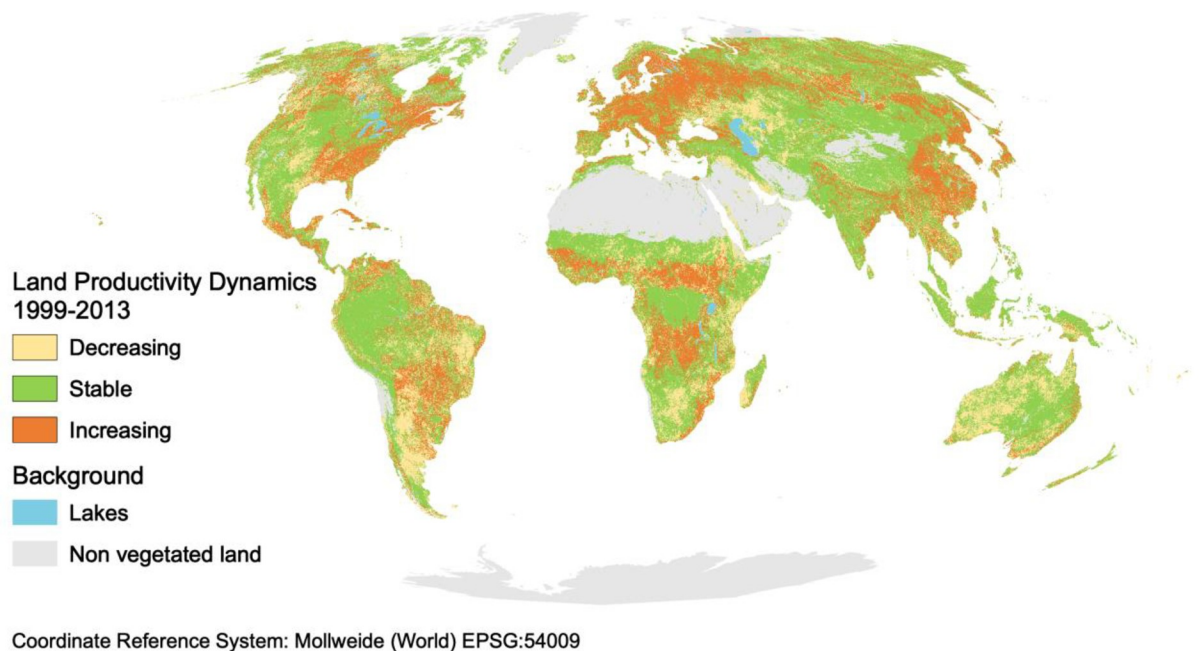

**Fig 1. Global map of land productivity dynamics showing the spatial distribution of the three Land Productivity Dynamics (LPD) classes (decreasing–stable–increasing).** The decreasing class includes areas with persistent severe decline in productivity, with persistent moderate decline in productivity and with stable but stressed productivity (persistent strong inter-annual productivity variations), as described in Methods. Land areas with no photosynthetically active vegetation are shown in grey (non vegetated land) and blue (lakes). Data source: JRC/WAD3 [4].

<https://doi.org/10.1371/journal.pone.0224958.g001>

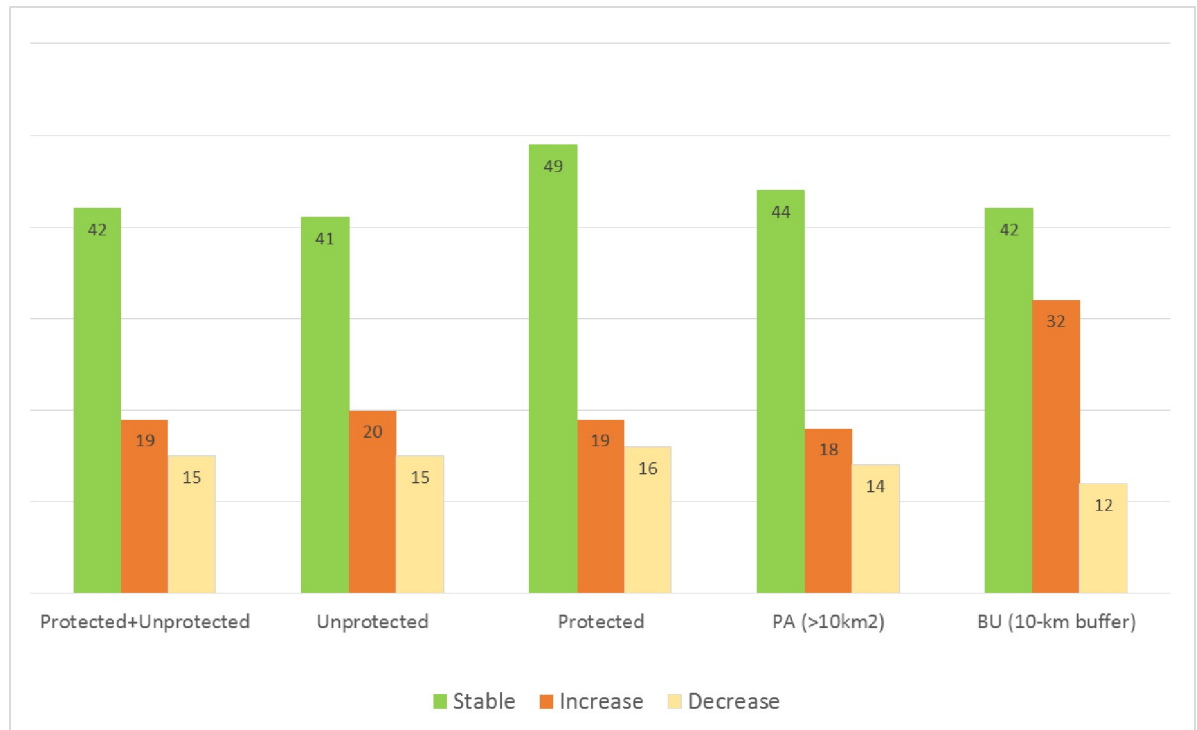

**Fig 2. Percentage of land with stable (green), increased (orange) and decreased (yellow) land productivity between 1999 and 2013 globally in the whole territory (Protected + Unprotected), in the whole unprotected territory (Unprotected), in all of the protected areas (Protected), in protected areas (PA) larger than 10 km<sup>2</sup> and in their unprotected 10-km buffers (BU).** Note that values do not need to add up to 100% because areas with no photosynthetically active vegetation which are recorded as null data.

<https://doi.org/10.1371/journal.pone.0224958.g002>

2 and 3. A similar result is found for the 10 km unprotected buffers surrounding the PAs (42%) (Figs 2 and 3). Persistent increases in productivity are more common in the unprotected land within the 10 km buffers surrounding PAs (32%) than within PAs (18%) (Figs 2 and 3). Decreasing productivity (combination of classes 1, 2 and 3 as described in Methods) is comparatively less common than stable or increased productivity: 14% of the land in PAs and 12% of the land in the unprotected buffers shows a decline in productivity (Figs 2 and 3).

### 3.2. Continental land productivity dynamics

The trends in land productivity within PAs are however unevenly distributed across continents. In Europe, 38% of the PA network is stable in land productivity, which decreases to 32% for the unprotected land surrounding PAs (Fig 3). These values decrease to 34% within PAs and to 30% around PAs, respectively, when focusing on the European Union (EU-28). These values are all lower than the global average; there is less land with stable productivity in and around PAs in Europe and in the EU than in any other continent (Fig 3). Africa is the continent with the second lowest percentage of land with stable productivity: 41% within PAs and 45% in the 10-km buffers around PAs (Fig 3). The highest percentage of land with stable productivity within PAs is found, at the continental level, in Oceania (57%), Asia (52%) and the Americas (46%). In all continents except Africa and the Americas, the percentage of land with stable productivity is higher within than around PAs (Fig 3).

The highest percentage of land where productivity has experienced a persistent increase in productivity from 1999 to 2013 is found within the unprotected 10 km buffer surrounding European PAs (46%), which is considerably higher than the corresponding percentage of 32%

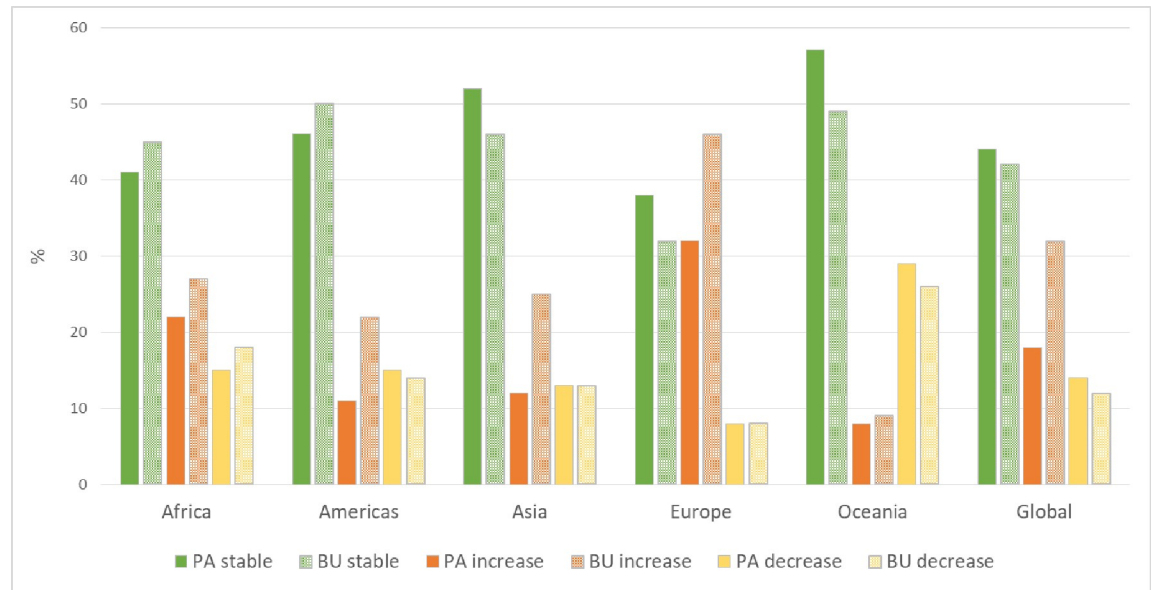

**Fig 3.** Percentage of land with stable (green), increased (orange) and decreased (yellow) land productivity between 1999 and 2013 in the protected areas (PA) larger than 10 km<sup>2</sup> and in their unprotected 10-km buffers (BU) for each continent and globally.

<https://doi.org/10.1371/journal.pone.0224958.g003>

within European PAs (Fig 3). These values increase to 49% and 42%, respectively, when considering only the countries belonging to the EU. The continent with the second highest percentage of persistent increase in land productivity is Africa, with 27% of the land around PAs and 22% of the land within PAs in this change class, followed by Asia and the Americas (Fig 3). The lowest values were found in Oceania, where only 9% of the unprotected land around PAs and 8% of the land within PAs has experienced a persistent increase in productivity (Fig 3). For all continents, the percentage of land with a persistent increase in productivity is higher in the 10 km buffers around PAs than within PAs (Fig 3). Our results show a general pattern for all continents where the increase in land productivity is always higher (almost 80% higher on average) in the unprotected land surrounding PAs than within them, with a wide range of values from 13% in Oceania to 108% in Asia or 44% higher in Europe.

The percentage of land with decreasing land productivity is generally similar within and around PAs for all continents (Fig 3). Oceania is the continent where declines in land productivity are more common both within (29%) and around PAs (26%; Fig 3), while the opposite is found for Europe (Fig 3). The percentage of protected land with decreasing productivity is about three times higher in Oceania than in Europe (Fig 3).

### 3.3. Global land productivity dynamics across protected area management categories

PAs with sustainable use of natural resources (IUCN management category VI) and natural monuments (category III) have the highest percentages (both above 50%) of stable land productivity within PA (Fig 4). Only PAs of management category II (national parks) show lower stable productivity (35%) than the global average (42%), as shown in Fig 4. For all IUCN categories, except wilderness areas (Ib) and national parks (II), there is more stability in the land productivity inside PAs than in the unprotected surrounding 10 km buffer (Fig 4). The largest difference in the percentage of stable land productivity between inside (61%) and outside (49%) PAs is found in category III (Fig 4), while the smallest one is found in categories V and

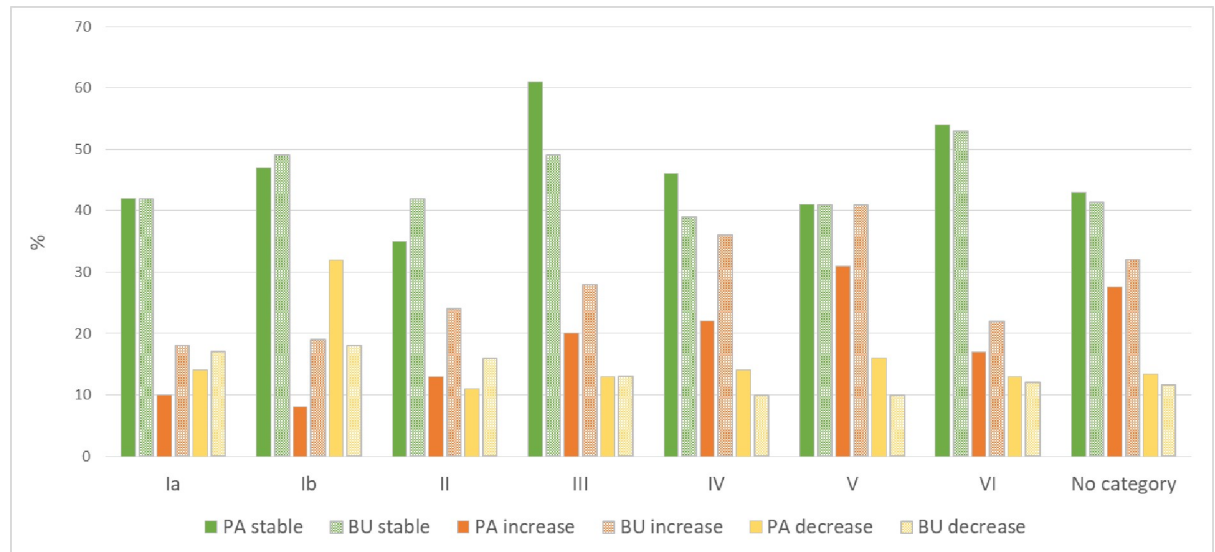

**Fig 4.** Percentage of land with stable (green), increased (orange) and decreased (yellow) land productivity between 1999 and 2013 in the protected areas (PA) larger than 10 km<sup>2</sup> and in their unprotected 10-km buffers (BU) for each IUCN management category of PAs: Ia (strict nature reserve), Ib (wilderness area), II (national park), III (national monument or feature), IV (habitat/species management area), V (protected landscape) and VI (protected area with sustainable use of natural resources).

<https://doi.org/10.1371/journal.pone.0224958.g004>

Ia (Fig 4); for category Ia the percentage of land with stable productivity is the same inside as outside PAs. For all the categories the percentage of land with increasing productivity is higher outside PAs than within them (Fig 4). The percentage of protected land with decreasing land productivity is highest in wilderness areas (Ib, 32%), while increasing land productivity is most widespread in protected landscapes (V, 31%). The decrease in land productivity is higher inside than outside PAs, except for management categories Ia and II (Fig 4).

The highest percentage of unstable land productivity (increasing and decreasing productivity combined) is found in PAs of class V (protected landscape) and their associated 10 km unprotected buffer, mostly due to a significant increase in land productivity within this PA category. The second highest percentage of unstable land productivity is found within PAs of management category Ib (wilderness area), mainly due to a significant decrease in land productivity within this PA category.

#### 4. Discussion

We found that, globally, 44% of the land in protected areas (PAs) of at least 10 km<sup>2</sup> has retained the productivity at stable levels during the 15 year period here considered (from 1999 to 2013). The percentage of land with stable productivity in the 10-km buffer zones surrounding PAs is slightly lower (42%). Our results, therefore, do not suggest any considerable difference between the protected and unprotected land regarding the stability in land productivity globally.

There is a considerable portion of land that, although being protected, has experienced decline in land productivity from 1999 to 2013. About one seventh of the protected land globally shows decline in primary productivity of above-ground biomass. This decline in land productivity, as here measured from satellite-based observations, may be related to a number of factors and processes such as deforestation, desertification or climate change, and may point to ongoing land degradation that may impact sustainability [4]. Land degradation is however a multifaceted and complex global phenomenon with distinct variations between regions and



across key land cover/land use systems which cannot be fully captured by a single indicator such as the satellite-based observed changes of above-ground biomass here considered, and would need to be explored in more detail in further research.

In the same way as declining trends in land productivity do not indicate land degradation per se, increasing trends in land productivity do not necessarily indicate a recovery or positive outcome from a conservation perspective [4]. For instance, increased productivity is sometimes achieved at the cost of other land resources, such as water (irrigation) or soil, or is the result of the intense use of fertilizers associated with intensive agriculture [29]. It can be also driven as a consequence of nitrogen deposition, CO<sub>2</sub> fertilization, and climate change [30–33]. In several of these cases it can lead to subsequent degradation, which would be observable only in later stages. In addition, land cover and land use changes, such as decrease of primary forest cover at the expense of fast-growing tree plantations or highly-productive crops under intensive agricultural land use, can lead to an increase in the observed productivity of above-ground vegetation while having significant negative impacts on the conservation of natural resources, biodiversity and ecosystem services [29]. In rangelands and savannah, increasing productivity may be a sign of bush encroachment, which can modify the biodiversity and ecological functioning of grasslands (e.g. [34]). In other ecosystems, it may arise from invasions by native or alien plant species.

For these reasons, the considerable percentage of land in PAs (18%) that has experienced an increase in productivity may be interpreted as a signal of ongoing changes that in many cases may not have benefits for the conservation objectives for which PAs have been declared. This percentage is however substantially higher in the unprotected land surrounding PAs (32%), globally almost 80% higher outside than inside. These findings may be indicative of a generally positive conservation outcome of PAs, which (compared to their surroundings) have avoided in many areas long-term alterations by humans aimed at increasing the productive capacity of land (e.g. through fertilizer use and/or irrigation), and instead maintained rather stable productivity levels. The increased productivity around PAs may be also indicative of more human activity or human pressure outside [35], related to more human settlements [36] and more energy availability [37] that drive a more intensive use of the land. It may also be related to the fact that traditionally humans choose to settle in the most productive land [38]. Other potential drivers of increase in land productivity, such as increased water supply from glacier melting or longer growing seasons in high-latitude areas driven by climate change or long-term vegetation recovery from previous natural or human-caused disturbances, may also play a significant role and may not be necessarily detrimental to biodiversity. It is however out of the reach and scope of this study to disentangle and specifically consider each of these processes, factors, and their complex interactions, which remains to be tackled in further research. In any case, the fact that the percentage of land with increased productivity is notably lower within than around PAs, as we found in this study, may be understood as a positive indicator of the relative ability of PAs to prevent changes that may pose a risk to their conservation objectives.

Europe is the continent with the lowest percentage of land with stable productivity levels in PAs and with the largest share of protected land with increasing land productivity. These results may be related to the relatively high population density and share of agricultural land use in protected areas, which is higher in Europe than in any other continent, and could explain some of the dynamics observed here [39]. Also, rural land abandonment processes have triggered the expansion of forests and woodlands in mountain areas and former agricultural lands in many European countries, often showing increasing land productivity in these areas as measured through the NDVI [40].

Our results suggest that some PA management categories are more effective than others in maintaining land productivity. In particular, PAs of management category V (protected landscape) have the highest unstable land productivity within PAs and around them, mainly due to the important recorded increases in land productivity from 1999 to 2013. The same pattern has been detected by De la Fuente et al. [36] regarding 40-year trends in built-up areas within and around PAs. They found PAs with IUCN category V had the highest percentage of built up area both within PAs and in their 10-km unprotected buffers. On the contrary, PAs with sustainable use of natural resources (category VI) and natural monuments (category III) are those with the highest percentages of land with stable productivity. Of particular interest is the case of PAs of management category VI, which cover a significant amount of land globally; our results suggest that, in terms of maintaining stable land productivity, they are more successful compared to some 'higher' PA categories. Leroux et al. [41] previously reported that category VI protected areas are generally larger and have a relatively low human footprint compared to other PA categories. However, Shafer [42] provides cautionary thoughts on management categories V-VI and the complex balance to be found between conservation objectives and land use practices in the buffer zone.

We emphasize that our analysis of the differences in the share of area within different aggregation units (PAs for different management categories versus buffers) subject to persistent declines in primary productivity might point to ongoing land degradation, rather than areas which have already undergone degradation prior to the observation period and have reached a new equilibrium from which they do not further degrade within the observation period. Therefore, we acknowledge that our assessment may underestimate and leave unreported previous land degradation that may have occurred in PAs before 1999, which is the first year in our temporal analysis. On the other hand, the persistent land productivity changes here reported point to long-term alteration of the health and productive capacity of land. The primary productivity of a stable land system is not a steady state, but is often highly variable between different years and vegetation growth cycles due to natural variation and/or human intervention. This implies that land productivity changes cannot be assessed by comparing land productivity values of single reference years or averages of a few years. On the contrary, approaches must be based on longer term trends on multi-temporal change and trend analysis which are continuously repeated (persistent) in defined time steps using an extended time series, as is the case of the dataset and analyses used here. Despite the long-term perspective on persistent land productivity changes here adopted, we recognize that it is necessary to incorporate other factors different from biomass trends into the analysis of land degradation. To identify critical land degradation zones, land productivity must be analysed within the context of anthropogenic land use and other environmental changes.

In conclusion, we have provided an assessment of land productivity dynamics in and around PAs worldwide that points to a generally positive effect of the protected area system on the conservation of land productivity. At the same time, we report that almost half of the land under protection has experienced changes (either declines or increases) in land productivity over the last 15 years. These changes may be related to a range of pressures and factors (from climate change to land use intensification) that may be detrimental for the long-term conservation of ecosystem health, biological diversity and ecosystem services. Additional and more detailed studies are needed to further analyse and disentangle the specific contribution to land productivity dynamics and potential land degradation of each of these drivers, processes and their complex interaction in different regions of the world.

## Author Contributions

**Conceptualization:** Begoña de la Fuente, Grégoire Dubois.

**Data curation:** Andrea Mandrici, Eduardo Garcia Bendito.

**Formal analysis:** Begoña de la Fuente, Mélanie Weynants, Giacomo Delli, Andrea Mandrici, Eduardo Garcia Bendito.

**Investigation:** Bastian Bertzky, Grégoire Dubois.

**Methodology:** Giacomo Delli, Andrea Mandrici, Grégoire Dubois.

**Project administration:** Grégoire Dubois.

**Software:** Andrea Mandrici.

**Supervision:** Grégoire Dubois.

**Validation:** Giacomo Delli.

**Writing – original draft:** Begoña de la Fuente, Mélanie Weynants, Bastian Bertzky, Grégoire Dubois.

**Writing – review & editing:** Begoña de la Fuente, Bastian Bertzky, Grégoire Dubois.

## References

1. Vitousek P.M., Ehrlich P.R., Ehrlich A.H., Matson P.A., 1986. Human Appropriation of the Products of Photosynthesis. *BioScience* 36 (6), 363–373.
2. Erb K.H., et al., 2009. Analyzing the global human appropriation of net primary production—processes, trajectories, implications. An introduction. *Ecol. Econ.* 69,250–259.
3. Ellis E. C., et al., 2010. Anthropogenic transformation of the biomes, 1700 to 2000. *Global Ecology and Biogeography*. 19, 589–606 <http://dx.doi.org/10.1111/j.1466-8238.2010.00540.x>
4. Cherlet M., Hutchinson C., Reynolds J., Hill J., Sommer S., von Maltitz G. (Eds.), 2018. *World Atlas of Desertification*. Publication Office of the European Union, Luxembourg. <http://wad.jrc.ec.europa.eu>
5. Yengoh G. T., Dent D., Olsson L., Tengberg A. E., Tucker C.J. III, Eds., 2016. Use of the Normalized Difference Vegetation Index (NDVI) to Assess Land Degradation at Multiple Scales (Springer, 2016), Springer Briefs in Environmental Science, <https://doi.org/10.1007/978-3-319-24112-8>
6. Prince S.D., 2004. Mapping desertification in Southern Africa. In *Land Change Science: Observing, Monitoring and Understanding Trajectories of Change on the Earth's Surface*; Gutman G., Janetso A., Eds.; Springer: Berlin, Germany; pp. 163–184.
7. UNCCD, 2013. In: Report of the Conference of the Parties on its eleventh session, held in Windhoek from 16 to 27 September 2013. ICCD/COP(11)/23/Add.1 (United Nations Convention to Combat Desertification (UNCCD), Bonn, 2013), pp. 79–83, available at <http://www.unccd.int/Lists/OfficialDocuments/cop11/23add1eng.pdf>.
8. UNCCD (2015). In: Report of the Conference of the Parties on its twelfth session, held in Ankara from 12 to 23 October 2015. Part two: Actions. ICCD/COP(12)/20/Add.1 (United Nations Convention to Combat Desertification (UNCCD), Bonn, 2015), p. 8, available at <https://www2.unccd.int/official-documents/cop-12-ankara-2015/iccdcop1220add1>.
9. Watson J.E.M., Dudley N., Segan D.B., Hockings M., 2014. The performance and potential of protected areas. *Nature* 515, 67–73. <https://doi.org/10.1038/nature13947> PMID: 25373676
10. UNEP-WCMC, IUCN and NGS, 2018. *Protected Planet Report 2018*. UNEP-WCMC, IUCN and NGS: Cambridge UK; Gland, Switzerland; and Washington, D.C., USA. [https://livereport.protectedplanet.net/pdf/Protected\\_Planet\\_Report\\_2018.pdf](https://livereport.protectedplanet.net/pdf/Protected_Planet_Report_2018.pdf)
11. Dudley, N. (Editor), 2008. *Guidelines for Applying Protected Area Management Categories*. Gland, Switzerland: IUCN. [https://cmsdata.iucn.org/downloads/guidelines\\_for\\_applying\\_protected\\_area\\_management\\_categories.pdf](https://cmsdata.iucn.org/downloads/guidelines_for_applying_protected_area_management_categories.pdf)
12. Mulongoy K.J., Gidda S.B., 2008. *The Value of Nature: Ecological, Economic, Cultural and Social Benefits of Protected Areas*. Secretariat of the Convention on Biological Diversity, Montreal, Canada. <https://www.cbd.int/doc/publications/cbd-value-nature-en.pdf>

13. Vačkář D., Harmáčková Z. V., Kaňková H., & Stupková K., 2016. Human transformation of ecosystems: comparing protected and unprotected areas with natural baselines. *Ecological indicators*, 66, 321–328.
14. CBD, 2010. COP 10 Decision X/2: Strategic Plan for Biodiversity 2011–2020. 10th Meeting of the Conference of the Parties to the Convention on Biological Diversity (CBD), Nagoya, Japan. Available at <https://www.cbd.int/decision/cop/?id=12268>
15. UNGA, 2015. Transforming our World: The 2030 Agenda for Sustainable Development. UN General Assembly, 21 October 2015, A/RES/70/1. Available at: <https://www.refworld.org/docid/57b6e3e44.html> [accessed 13 February 2019]
16. UNEP-WCMC and IUCN, 2018. Protected Planet: The World Database on Protected Areas (WDPA) July 2018, Cambridge, UK: UNEP-WCMC and IUCN. Available at: [www.protectedplanet.net](http://www.protectedplanet.net).
17. UNEP-WCMC, 2017. World Database on Protected Areas User Manual 1.5. UNEP-WCMC: Cambridge, UK. Available at: [http://wcmc.io/WDPA\\_Manual](http://wcmc.io/WDPA_Manual)
18. Dubois G., et al., 2016. Integrating multiple spatial datasets to assess protected areas: lessons learnt from the Digital Observatory for Protected Areas (DOPA). *ISPRS International Journal of Geo-Information*, 5, 242. <http://dx.doi.org/10.3390/ijgi5120242>
19. Bastin, L., Mandrici, A., Battistella, L., Dubois, G., 2017. Processing Conservation Indicators with Open Source Tools: Lessons Learned from the Digital Observatory for Protected Areas. In *Free and Open Source Software for Geospatial (FOSS4G) Conference Proceedings (Vol. 17, No. 1, p. 14)*. <http://scholarworks.umass.edu/foss4g/vol17/iss1/14>
20. UNEP-WCMC and IUCN, 2016. Protected Planet Report 2016. UNEP-WCMC and IUCN: Cambridge UK and Gland, Switzerland. <https://www.protectedplanet.net/c/protected-planet-report-2016>
21. Saura S., Bertzky B., Bastin L., Battistella L., Mandrici A., Dubois G., 2018. Protected area connectivity: Shortfalls in global targets and country-level priorities. *Biological Conservation*, 219, 53–67. <https://doi.org/10.1016/j.biocon.2017.12.020> PMID: 29503460
22. Sommer S., Cherlet M. & Ivits E., 2017. Mapping land productivity dynamics: detecting critical trajectories of global land transformations. In: *The Global Land Outlook (first edition)*, United Nations Convention to Combat Desertification. Annex Two; pp 321–333. Bonn, Germany.
23. Ivits E., Cherlet M., Sommer S., Mehl W., 2012. Addressing the complexity in non-linear evolution of vegetation phenological change with time-series of remote sensing images. *Ecological Indicators*, 26, 49–60. <https://doi.org/10.1016/j.ecolind.2012.10.012>
24. Ivits E., Cherlet M., Sommer S., Mehl W., 2013. Ecosystem Functional Units characterized by satellite observed phenology and productivity gradients: a case study for Europe. *Ecological Indicators*, pp. 17–28. <https://doi.org/10.1016/j.ecolind.2012.11.010>
25. Ivits E., Horion S. Fensholt, R. Cherlet, M., 2014. Global Ecosystem Response Types Derived from the Standardized Precipitation Evapotranspiration Index and GIMMS3g FAPAR series. *Remote Sensing*, 6 (5), 4266–4288; <https://doi.org/10.3390/rs6054266>
26. Ivits, E. & Cherlet, M., 2016. Land-Productivity Dynamics Towards integrated assessment of land degradation at global scales (EUR 26052, Publications Office of the European Union), <https://doi.org/10.2788/59315> <http://publications.jrc.ec.europa.eu/repository/handle/JRC80541>
27. Guo W.Q., Yang T.B., Dai J.G., Shi L., Lu Z.Y., 2008. Vegetation cover changes and their relationship to climate variation in the source region of the Yellow River, China, 1990–2000. *Int. J. Remote Sens.* 29 (7), 2085–2103
28. GAUL, 2015. The Global Administrative Unit Layers (GAUL) dataset, implemented by FAO within the CountrySTAT and Agricultural Market Information System (AMIS) projects. Available from: <http://www.fao.org/geonetwork/srv/en/metadata.show?id=12691>
29. Bradford J. B., Lauenroth W. K., & Burke I. C., 2005. The impact of cropping on primary production in the US Great Plains. *Ecology*, 86(7), 1863–1872. <https://doi.org/10.1890/04-0493>
30. Nemani R. R., Keeling C. D., Hashimoto H., Jolly W. M., Piper S. C., Tucker C. J., et al 2003. Climate-driven increases in global terrestrial net primary production from 1982 to 1999. *Science*, 300(5625), 1560–1563. <https://doi.org/10.1126/science.1082750> PMID: 12791990
31. Boisvenue C., & Running S. W., 2006. Impacts of climate change on natural forest productivity—evidence since the middle of the 20th century. *Global Change Biology*, 12(5), 862–882. <https://doi.org/10.1111/j.1365-2486.2006.01134.x>
32. Thomas R. Q., Canham C. D., Weathers K. C., & Goodale C. L., 2010. Increased tree carbon storage in response to nitrogen deposition in the US. *Nature Geoscience*, 3(1), 13.
33. Pettorelli N., Chauvenet A. L., Duffy J. P., Cornforth W. A., Meillere A., & Baillie J. E., 2012. Tracking the effect of climate change on ecosystem functioning using protected areas: Africa as a case study. *Ecological Indicators*, 20, 269–276.

34. Leitner M., Davies A. B., Parr C.L., Eggleton P., Robertson M. P., 2018. Woody encroachment slows decomposition and termite activity in an African savanna. *Global Change Biology*, 24 (6), 2597–2606; <https://doi.org/10.1111/gcb.14118> PMID: 29516645
35. Geldmann J., Joppa L. N., & Burgess N. D., 2014. Mapping change in human pressure globally on land and within protected areas. *Conservation Biology* 28: 1604–1616. <https://doi.org/10.1111/cobi.12332> PMID: 25052712
36. De la Fuente B., Bertzky B., Delli G., Conti M., Mandrici A., Florczyk A., et al. 2019. Built-up areas within and around protected areas: global patterns and 40-year trends. Submitted
37. Luck G.W., 2007. The relationships between net primary productivity, human population density and species conservation. *Journal of Biogeography* 34, 201–212.
38. O'Neill D. W., & Abson D. J., 2009. To settle or protect? A global analysis of net primary production in parks and urban areas. *Ecological Economics*, 69(2), 319–327.
39. Weber H., & Sciubba J. D. (2019). The Effect of Population Growth on the Environment: Evidence from European Regions. *European Journal of Population*, 35(2), 379–402. <https://doi.org/10.1007/s10680-018-9486-0> PMID: 31105504
40. Tang Z., Fang J., Sun J., & Gaston K. J. (2011). Effectiveness of protected areas in maintaining plant production. *Plos One*, 6(4), e19116. <https://doi.org/10.1371/journal.pone.0019116> PMID: 21552560
41. Leroux S.J., Krawchuk M.A., Schmiegelow F., Cumming S.G., Lisgo K., Anderson L.G., et al. 2010. Global protected areas and IUCN designations: Do the categories match the conditions? *Biological Conservation*, 143, 609–616.
42. Shafer C.L., 2015. Cautionary thoughts on IUCN protected area management categories V–VI. *Global Ecology and Conservation*, 3, 331–348.
